# Supplementary material for: Carboxylate-assisted acylamide metal–organic frameworks: synthesis, structure, thermostability and luminescence studies
Source: Royal Society of Chemistry journal article supplement (doi:10.1039/c2ce25602a), 2012-01-01
Supplement: c2ce25602a.pdf [file c2ce25602a.pdf]

# Carboxylate-Assistant Acylamide Metal-Organic Frameworks: Synthesis, Structure, Thermostability, and Luminescence Studies

Gong-ming Sun, Hai-xiao Huang, Xiao-zhao Tian, Yu-mei Song, Yan Zhu, Zi-jun Yuan, Wen-yuan Xu, Ming-biao Luo, Shu-juan Liu, Xue-feng Feng, and Feng Luo

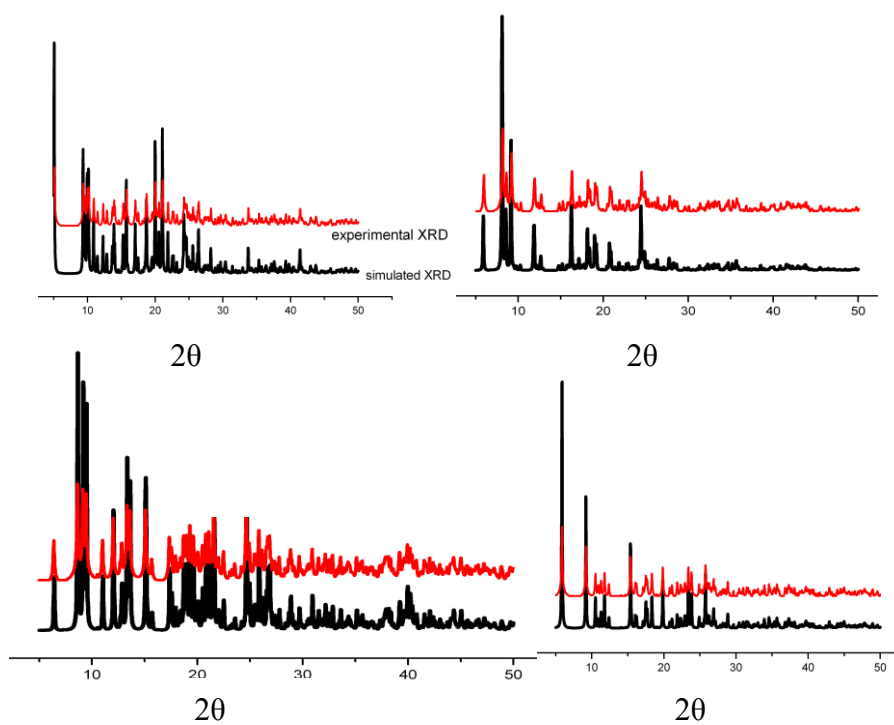

**Figure S1.** The experimental/black XRD patterns from single crystal data and experimental XRD patterns/red from the bulk samples of **1-4**.
